# Supplementary material for: Microscopy-based chromosome conformation capture enables simultaneous visualization of genome organization and transcription in intact organisms
Source: bioRxiv or medRxiv preprint supplement (doi:10.1101/434266), 2019-01-21

# Figure S2

## Chromosome pairing

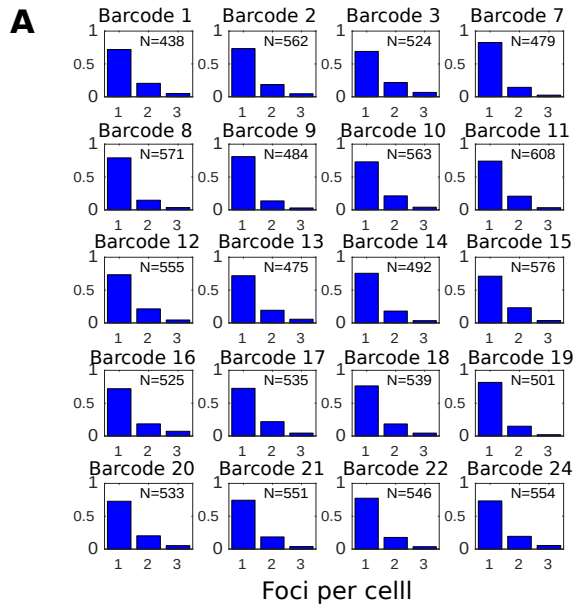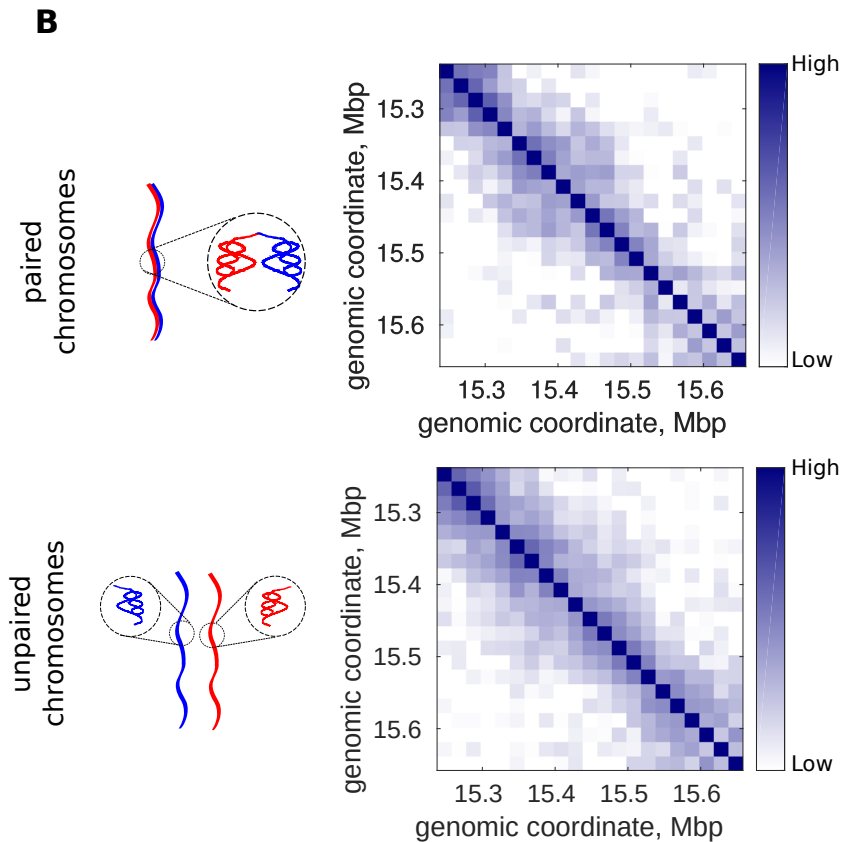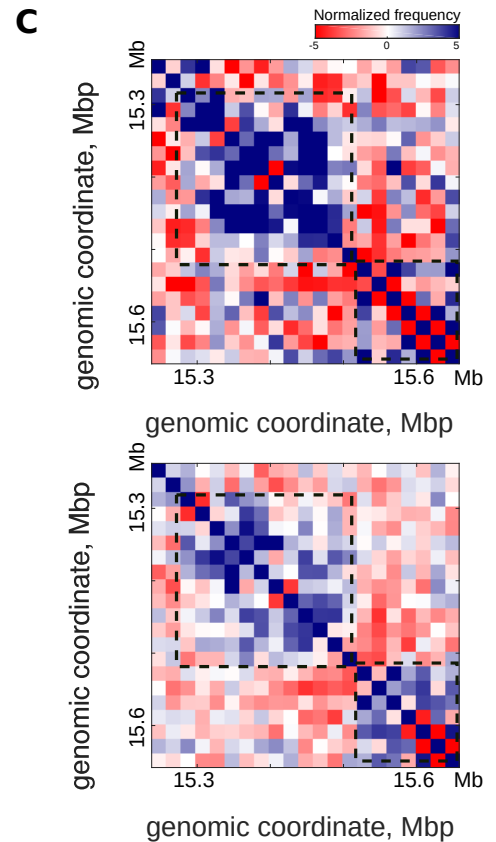

Supplement: Supplementary file [file 434266-2.pdf]
