# Supplementary material for: Microscopy-based chromosome conformation capture enables simultaneous visualization of genome organization and transcription in intact organisms
Source: bioRxiv or medRxiv preprint supplement (doi:10.1101/434266), 2019-01-21

# Figure S3

**A**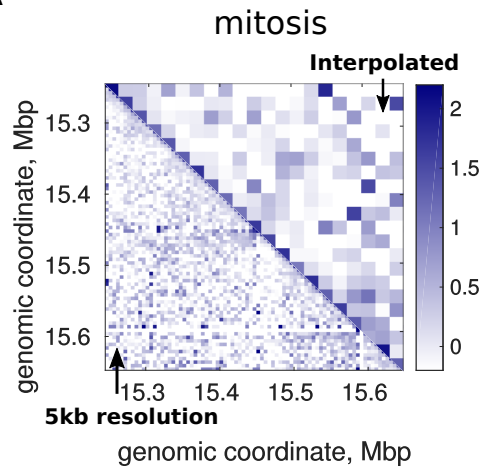**B**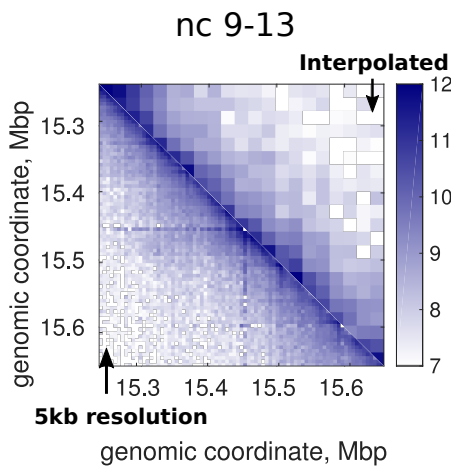**C**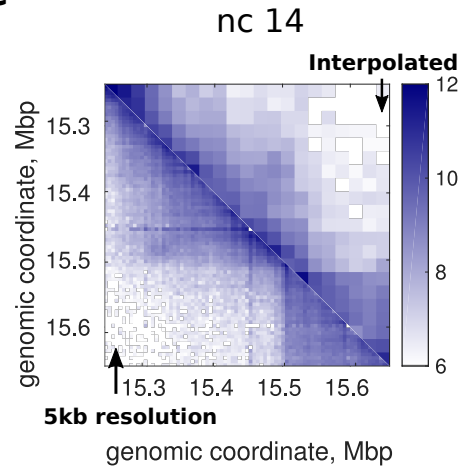**D**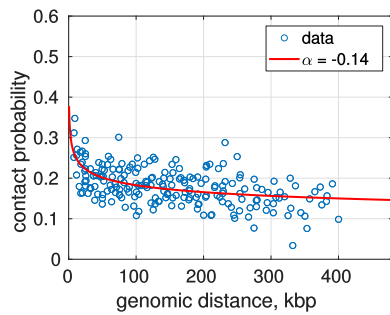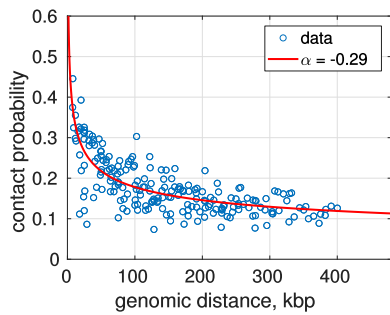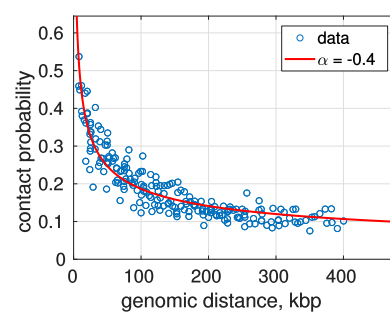

Supplement: Supplementary file [file 434266-3.pdf]
