# Supplementary material for: Microscopy-based chromosome conformation capture enables simultaneous visualization of genome organization and transcription in intact organisms
Source: bioRxiv or medRxiv preprint supplement (doi:10.1101/434266), 2019-01-21
Supplement: Supplementary file [file 434266-5.pdf]

## Extended Data for:

**Microscopy-based chromosome conformation capture enables simultaneous observation of genome organization and transcription in intact organisms**

### Table of Contents

#### [Tables](#)

[Supplementary Table 1 - Oligopaint probesets \(barcodes\)](#)

[Supplementary Table 2: Primer used for PCR amplification](#)

[Supplementary Table 3: Readout probes sequences](#)

[Supplementary Table 4: Oligopaint library \(online file\)](#)

[Supplementary Table 5: Hi-C and Chip-Seq](#)

## Tables

*Supplementary Table 1 - Oligopaint probesets (barcodes)*

| Barcode | Oligopaint library | Universal Primer | Readout | Start coordinate | End coordinate | Coverage (kb) | Number of Oligos |
|---------|--------------------|------------------|---------|------------------|----------------|---------------|------------------|
| 1       | 2L_42_oligo        | primer2          | revRT1  | 15244500         | 15251200       | 6.7           | 75               |
| 2       | 2L_42_oligo        | primer2          | revRT2  | 15269900         | 15275500       | 5.6           | 75               |
| 3       | 2L_42_oligo        | primer2          | revRT3  | 15331200         | 15337700       | 6.5           | 75               |
| 4       | 2L_42_oligo        | primer2          | revRT22 | 15370000         | 15376400       | 6.4           | 75               |
| 5       | 2L_42_oligo        | primer2          | revRT23 | 15421000         | 15427000       | 6             | 75               |
| 6       | 2L_42_oligo        | primer2          | revRT24 | 15433900         | 15440000       | 6.1           | 75               |
| 7       | 2L_42_oligo        | primer2          | revRT7  | 15454200         | 15460000       | 5.8           | 75               |
| 8       | 2L_42_oligo        | primer2          | revRT8  | 15474000         | 15480300       | 6.3           | 75               |
| 9       | 2L_42_oligo        | primer2          | revRT9  | 15499000         | 15504500       | 5.5           | 75               |
| 10      | 2L_42_oligo        | primer2          | revRT10 | 15548000         | 15554800       | 6.8           | 75               |
| 11      | 2L_42_oligo        | primer2          | revRT11 | 15598000         | 15604300       | 6.3           | 75               |
| 12      | 2L_42_oligo        | primer2          | revRT12 | 15644000         | 15652000       | 8             | 75               |
| 13      | 2L_42_oligo        | primer2          | revRT13 | 15255000         | 15259000       | 4             | 60               |
| 14      | 2L_42_oligo        | primer2          | revRT14 | 15263000         | 15267000       | 4             | 56               |
| 15      | 2L_42_oligo        | primer2          | revRT15 | 15295000         | 15300500       | 5.5           | 75               |
| 16      | 2L_42_oligo        | primer2          | revRT16 | 15320000         | 15325500       | 5.5           | 75               |
| 17      | 2L_42_oligo        | primer2          | revRT17 | 15352000         | 15358000       | 6             | 60               |
| 18      | 2L_42_oligo        | primer2          | revRT18 | 15395000         | 15401300       | 6.3           | 75               |
| 19      | 2L_42_oligo        | primer2          | revRT19 | 15486500         | 15491500       | 5             | 59               |
| 20      | 2L_42_oligo        | primer2          | revRT20 | 15523000         | 15529000       | 6             | 75               |
| 21      | 2L_42_oligo        | primer2          | revRT21 | 15574000         | 15580300       | 6.3           | 75               |
| 22      | 2L_42_oligo        | primer2          | revRT25 | 15627000         | 15633000       | 6             | 75               |

## PCR primers and secondary oligonucleotides

Supplementary Table 2: Primer used for PCR amplification  
(Forward primer was also used for Reverse Transcription)

| Primer Name  | Sequence                                    |
|--------------|---------------------------------------------|
| BB287-FWD    | CGCTCGGTCTCCGTTTCGTCTC                      |
| T7+BB288-REV | TAATACGACTCACTATAGGGTTGGGCTAGGTACAGGGTTCAGC |

Supplementary Table 3: Readout probes sequences

| Readout | Sequence                                                  |
|---------|-----------------------------------------------------------|
| revRT1  | CACCGACGTTCGCATAGAACGGAAGAGCGTGTG/iThioMC6-D//3AlexF647N/ |
| revRT2  | GCGATCATTGGGCACAACGTCCGCTCTTGGTC/iThioMC6-D//3AlexF647N/  |
| revRT3  | TCGCGCTTTCATCGTATCGCGGATCACGTGTC/iThioMC6-D//3AlexF647N/  |
| revRT7  | GATCCGATTGGAACCGTCCCAAGCGTTGCG/iThioMC6-D//3AlexF647N/    |
| revRT8  | GCTATCGTTCGTTTCGAGGCCAGAGCATTTCG/iThioMC6-D//3AlexF647N/  |
| revRT9  | CCCATGATCGTCCGATCTGGTCGGATTTGT/iThioMC6-D//3AlexF647N/    |
| revRT10 | AACGAGACGGTCAATCGCGCTGCATACTTG/iThioMC6-D//3AlexF647N/    |
| revRT11 | AGTGAATTGCTGCGCATCGGCGTACGACTT/iThioMC6-D//3AlexF647N/    |
| revRT12 | AAGTTCAACGGGACCGTGGCCGATGTTTCG/iThioMC6-D//3AlexF647N/    |
| revRT13 | TCTGTTTGACGCGCTGGACGGTGGATTTCGT/iThioMC6-D//3AlexF647N/   |
| revRT14 | GCAAGGGACGCTCGTTACGGGGATTTTCGCG/iThioMC6-D//3AlexF647N/   |
| revRT15 | TTAGTCGTCGCAACGCCAGGCAACTCATGC/iThioMC6-D//3AlexF647N/    |
| revRT16 | GTAAGCGCAACGGTGGACCGGAGACGACGG/iThioMC6-D//3AlexF647N/    |
| revRT17 | AAATTGCGTGACGGACCTGGGCCATTGGCC/iThioMC6-D//3AlexF647N/    |
| revRT18 | GCAGATTCCGCTACGCTCCGATTTCGATCAA/iThioMC6-D//3AlexF647N/   |
| revRT19 | GTATCCGTTCCCGACAAGCGGATCCGCGCG/iThioMC6-D//3AlexF647N/    |
| revRT20 | CGGCCGAATTACATCCGTCGTAATCGAGGC/iThioMC6-D//3AlexF647N/    |
| revRT21 | TAGCGCAGGAGGTCCACGACGTGCAAGGGTGT/iThioMC6-D//3AlexF647N/  |
| revRT22 | CGCAGCTCCACTTGATCTCGCTGGATCGTTCT/iThioMC6-D//3AlexF647N/  |
| revRT23 | CGAGCCAGGTCATCCTAGCCCATACGGCAATG/iThioMC6-D//3AlexF647N/  |
| revRT24 | GGTGTGGCTCGGTATCGTGCAAGGGTGAATGC/iThioMC6-D//3AlexF647N/  |
| revRT25 | ATTGCCCTACTCGCAAGCGGGAATACGGGC/iThioMC6-D//3AlexF647N/    |

Supplementary Table 5: Hi-C and Chip-Seq

| <b>DATASET</b>     | <b>SOURCE</b> | <b>ACCESSION</b> | <b>REFERENCE (PMID)</b> |
|--------------------|---------------|------------------|-------------------------|
| HiC_mitotic        | ArrayExpress  | E-MTAB-4918      | 28388407                |
| HiC_cycle9to13     | GEO           | GSE103625        | 30008320                |
| HiC_cycle14        | GEO           | GSE103625        | 30008320                |
| RNAseq_2to4h       | Encode        | ENCSR086YVX      | 22955616                |
| RNApol2S5_C14Early | GEO           | GSE62925         | 25748651                |
| RNApol2S5_C14Late  | GEO           | GSE62925         | 25748651                |
| H3K27me3_14c       | GEO           | GSE58935         | 25313869                |
| H3K27me3_LateE     | modEncode     | GSE47230         | 19536255                |
| PH_LateE           | GEO           | GSE60428         | 25284790                |
| PC_2to4h           | GEO           | GSE68983         | 27678375                |
| CTCF_LateE         | modEncode     | GSE47264         | 19536255                |
| CP190_LateE        | modEncode     | GSE47234         | 19536255                |
| SNA_2to4h          | GEO           | GSE68983         | 27678375                |
| Zld_c13            | GEO           | GSE30757         | 22028662                |
| Zld_c14            | GEO           | GSE30757         | 22028662                |
| GAF_LateE          | modEncode     | GSE47236         | 19536255                |
| GAF_2to4h          | GEO           | GSE68983         | 27678375                |
